# Supplementary material for: Contraceptive method use in the United States: trends and characteristics between 2008, 2012 and 2014
Source: PubMed Central journal article supplement — Contraception. Author manuscript; Available in PMC 2018 May 18. (PMC5959010; doi:10.1016/j.contraception.2017.10.003), 2017-10-13
Supplement: NIHMS957978-supplement-Supplemental_Table_1.pdf [file NIHMS957978-supplement-Supplemental_Table_1.pdf]

Supplemental Table 1. Percentage of current female contraceptive users ages 15-44 by method and selected user characteristics, 2008-2014, and significant differences between years from logistic regression

|                                         | pill |      |     | other hormonal |      |       | condom |      |       |
|-----------------------------------------|------|------|-----|----------------|------|-------|--------|------|-------|
|                                         | 2008 | 2014 | p   | 2008           | 2014 | p     | 2008   | 2014 | p     |
| <b>Total</b>                            | 27   | 25   | .19 | 7              | 7    | .98   | 16     | 15   | .14   |
| <b>Age</b>                              |      |      |     |                |      |       |        |      |       |
| 15-19                                   | 53   | 49   | .39 | 16             | 18   | .64   | 20     | 20   | .89   |
| 20-24                                   | 47   | 42   | .28 | 11             | 9    | .36   | 25     | 16   | <0.01 |
| 25-29                                   | 33   | 30   | .40 | 10             | 6    | .03   | 21     | 18   | .21   |
| 30-34                                   | 25   | 20   | .07 | 5              | 5    | .68   | 16     | 16   | .75   |
| 35-39                                   | 17   | 13   | .17 | 2              | 5    | .01   | 12     | 11   | .81   |
| 40-44                                   | 10   | 11   | .58 | 2              | 2    | .65   | 9      | 10   | .78   |
| <b>Race/ethnicity</b>                   |      |      |     |                |      |       |        |      |       |
| White, non-Hispanic                     | 32   | 30   | .33 | 5              | 5    | .86   | 14     | 12   | .27   |
| Black, non-Hispanic                     | 18   | 20   | .62 | 13             | 12   | .84   | 19     | 17   | .32   |
| Other or multiple races, non- Hispanic  | 21   | 21   | 1.0 | 6              | 5    | .44   | 27     | 20   | .13   |
| Hispanic                                | 20   | 18   | .51 | 8              | 8    | .99   | 18     | 17   | .68   |
| <b>Poverty status</b>                   |      |      |     |                |      |       |        |      |       |
| <100% federal poverty level             | 22   | 18   | .09 | 10             | 8    | .12   | 14     | 16   | .38   |
| 100-199%                                | 23   | 21   | .66 | 6              | 10   | <0.01 | 17     | 13   | .05   |
| 200-299%                                | 26   | 28   | .50 | 7              | 4    | .10   | 17     | 15   | .42   |
| 300% or higher                          | 34   | 31   | .31 | 5              | 5    | .83   | 17     | 14   | .30   |
| <b>Born outside US</b>                  |      |      |     |                |      |       |        |      |       |
| No                                      | 29   | 27   | .38 | 7              | 6    | .85   | 15     | 13   | .08   |
| Yes                                     | 19   | 16   | .17 | 6              | 7    | .70   | 23     | 23   | .95   |
| <b>Relationship status</b>              |      |      |     |                |      |       |        |      |       |
| Married                                 | 19   | 16   | .17 | 3              | 3    | .63   | 15     | 15   | .93   |
| Cohabiting                              | 32   | 26   | .06 | 10             | 6    | .04   | 16     | 13   | .34   |
| Not married or cohabitating             | 39   | 37   | .44 | 10             | 11   | .49   | 18     | 15   | .04   |
| <b>Education</b>                        |      |      |     |                |      |       |        |      |       |
| No high school diploma                  | 21   | 20   | .77 | 9              | 13   | .06   | 15     | 13   | .30   |
| High school or GED                      | 22   | 18   | .10 | 6              | 6    | .53   | 13     | 14   | .75   |
| Some college                            | 29   | 28   | .60 | 7              | 6    | .42   | 17     | 11   | <0.01 |
| College graduate                        | 35   | 30   | .11 | 5              | 4    | .58   | 19     | 19   | .10   |
| <b>Current insurance coverage</b>       |      |      |     |                |      |       |        |      |       |
| Private                                 | 32   | 31   | .53 | 5              | 6    | .78   | 16     | 13   | .12   |
| Medicaid                                | 21   | 16   | .02 | 11             | 12   | .83   | 13     | 14   | .72   |
| Other                                   | 26   | 31   | .47 | 12             | 5    | .11   | 12     | 12   | .91   |
| None                                    | 17   | 13   | .15 | 7              | 5    | .17   | 21     | 20   | .80   |
| <b>Parity</b>                           |      |      |     |                |      |       |        |      |       |
| 0                                       | 53   | 49   | .12 | 9              | 9    | .89   | 23     | 19   | .06   |
| 1-2                                     | 19   | 15   | .02 | 6              | 6    | .88   | 16     | 14   | .26   |
| 3 or more                               | 7    | 6    | .43 | 3              | 3    | .87   | 7      | 8    | .75   |
| <b>Number of future births expected</b> |      |      |     |                |      |       |        |      |       |
| 0                                       | 14   | 13   | .50 | 4              | 4    | .87   | 10     | 9    | .44   |
| 1-2                                     | 46   | 39   | .01 | 10             | 10   | .87   | 26     | 21   | .03   |
| 3 or more                               | 52   | 51   | .87 | 11             | 6    | .11   | 27     | 25   | .77   |

Notes: Survey years in column headings represent the midpoint of data collection years for each of the two NSFG surveys (2006-2010 and 2013-2015). Other hormonal methods include the patch, ring and injectables.
