# Supplementary material for: Contraceptive method use in the United States: trends and characteristics between 2008, 2012 and 2014
Source: PubMed Central journal article supplement — Contraception. Author manuscript; Available in PMC 2018 May 18. (PMC5959010; doi:10.1016/j.contraception.2017.10.003), 2017-10-13
Supplement: NIHMS957978-supplement-Supplemental_Table_2.pdf [file NIHMS957978-supplement-Supplemental_Table_2.pdf]

Supplemental Table 2: Among current female contraceptive users ages 15-44, adjusted odds ratios from logistic regression assessing associations between user characteristics and use of individual methods, 2014

|                                         | pill |         | other hormonal methods |         | condom |         |
|-----------------------------------------|------|---------|------------------------|---------|--------|---------|
|                                         | aOR  | p-value | aOR                    | p-value | aOR    | p-value |
| <b>Age</b>                              |      |         |                        |         |        |         |
| 15-24                                   | ref  |         | ref                    |         | ref    |         |
| 25-34                                   | 1.0  | .92     | 0.8                    | .32     | 1.2    | .35     |
| 35-44                                   | 0.7  | .18     | 0.5                    | .12     | 1.1    | .62     |
| <b>Race/ethnicity</b>                   |      |         |                        |         |        |         |
| White, non-Hispanic                     | ref  |         | ref                    |         | ref    |         |
| Black, non-Hispanic                     | 0.6  | <0.01   | 1.9                    | <0.01   | 1.5    | .02     |
| Other or multiple races, non-Hispanic   | 0.6  | .02     | 1.0                    | .91     | 1.4    | .16     |
| Hispanic                                | 0.7  | .09     | 1.5                    | .09     | 1.4    | .06     |
| <b>Poverty status</b>                   |      |         |                        |         |        |         |
| <100% federal poverty level             | ref  |         | ref                    |         | ref    |         |
| 100-199%                                | 1.2  | .24     | 1.5                    | .09     | 0.8    | .27     |
| 200-299%                                | 1.4  | .15     | 0.6                    | .19     | 0.8    | .40     |
| 300% or higher                          | 1.6  | .02     | 0.9                    | .61     | 0.7    | .15     |
| <b>Born outside US</b>                  |      |         |                        |         |        |         |
| No                                      | --   |         | --                     |         | ref    |         |
| Yes                                     | --   |         | --                     |         | 1.5    | .03     |
| <b>Relationship status</b>              |      |         |                        |         |        |         |
| Married                                 | ref  |         | ref                    |         | ref    |         |
| Cohabiting                              | 1.2  | .50     | 1.5                    | .26     | 0.6    | .08     |
| Not married or cohabiting               | 1.5  | .03     | 2.2                    | .02     | 0.7    | .02     |
| <b>Education</b>                        |      |         |                        |         |        |         |
| No high school diploma                  | --   |         | ref                    |         | ref    |         |
| High school or GED                      | --   |         | 0.5                    | .01     | 1.3    | .23     |
| Some college                            | --   |         | 0.4                    | <0.01   | 0.9    | .77     |
| College graduate                        | --   |         | 0.4                    | .05     | 1.9    | <0.01   |
| <b>Insurance coverage</b>               |      |         |                        |         |        |         |
| No                                      | ref  |         | ref                    |         | ref    |         |
| Yes (private, Medicaid, other)          | 1.9  | <0.01   | 1.6                    | .09     | 0.6    | <0.01   |
| <b>Parity</b>                           |      |         |                        |         |        |         |
| 0                                       | ref  |         | ref                    |         | ref    |         |
| 1-2                                     | 0.3  | <0.01   | 1.0                    | .97     | 0.8    | .12     |
| 3 or more                               | 0.2  | <0.01   | 0.5                    | .06     | 0.5    | .01     |
| <b>Number of future births expected</b> |      |         |                        |         |        |         |
| 0                                       | ref  |         | --                     |         | ref    |         |
| 1-2                                     | 1.9  | <0.01   | --                     |         | 2.5    | <0.01   |
| 3 or more                               | 1.8  | .03     | --                     |         | 3.6    | <0.01   |

Notes: 2014 represents the midpoint of the data collection years for the 2013-2015 NSFG survey. Other hormonal methods include the patch, ring and injectables.
